# Supplementary material for: Peroxygenase-Catalyzed Selective Synthesis of Calcitriol Starting from Alfacalcidol
Source: MDPI journal article supplement (doi:10.3390/antiox11061044), 2022-05-25
Supplement: s1 [file s1]

# *Antioxidants*

## Supporting Information

### **Peroxygenase-Catalyzed Selective Synthesis of Calcitriol Starting from Alfacalcidol**

**Yuanying Li <sup>1,2</sup>, Pengpeng Zhang <sup>1,2</sup>, Zhoutong Sun <sup>1,2</sup>, Huanhuan Li<sup>1,3</sup>, Ran Ge <sup>1,2</sup>, Xiang Sheng <sup>1,2</sup>, and Wuyuan Zhang<sup>1,2\*</sup>**

<sup>1</sup> Tianjin Institute of Industrial Biotechnology, Chinese Academy of Sciences, Tianjin 300308, China; liyy@tib.cas.cn (Y.L.); zhangpp@tib.cas.cn (P.Z.); sunzht@tib.cas.cn (Z.S.); li-huan@stu.xjtu.edu.cn (H.L.); ger@tib.cas.cn (R.G.); shengx@tib.cas.cn (X.S.); zhangwy@tib.cas.cn (W.Z.)

<sup>2</sup> National Center of Technology Innovation for Synthetic Biology, Tianjin 300308, China

<sup>3</sup> School of Chemical Engineering and Technology, Xi'an Jiaotong University, Xi'an

\* Correspondence: zhangwy@tib.cas.cn; Tel.: +86 22-8486-6462

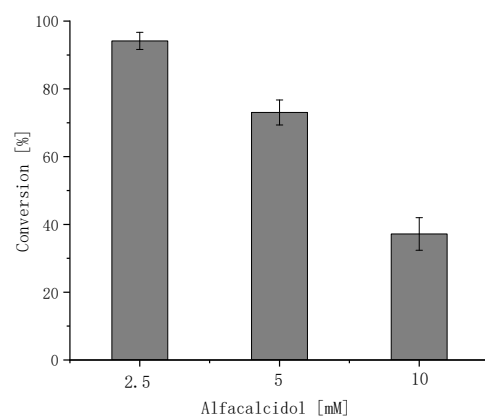

**Figure S1.** *Aae*UPO (Pada-I)-catalyzed oxyfunctionalization of alfacalcidol to calcitriol (path I) at various substrate loadings. Conditions: [*Aae*UPO] = 2.5  $\mu$ M, [substrate] = 2.5-10 mM, NaPi buffer (50 mM, pH 6), 40% (v/v) acetone, [ $\text{H}_2\text{O}_2$ ] = 1.5 mM  $\text{h}^{-1}$ , 8 h, 25  $^\circ\text{C}$ , 1 mL.

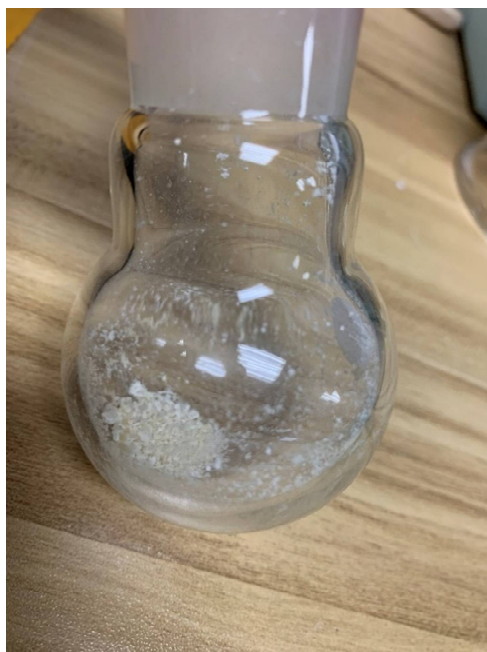

**Figure S2.** Image of the isolated product calcitriol (150 mg) obtained from a semi-preparative scale synthesis.

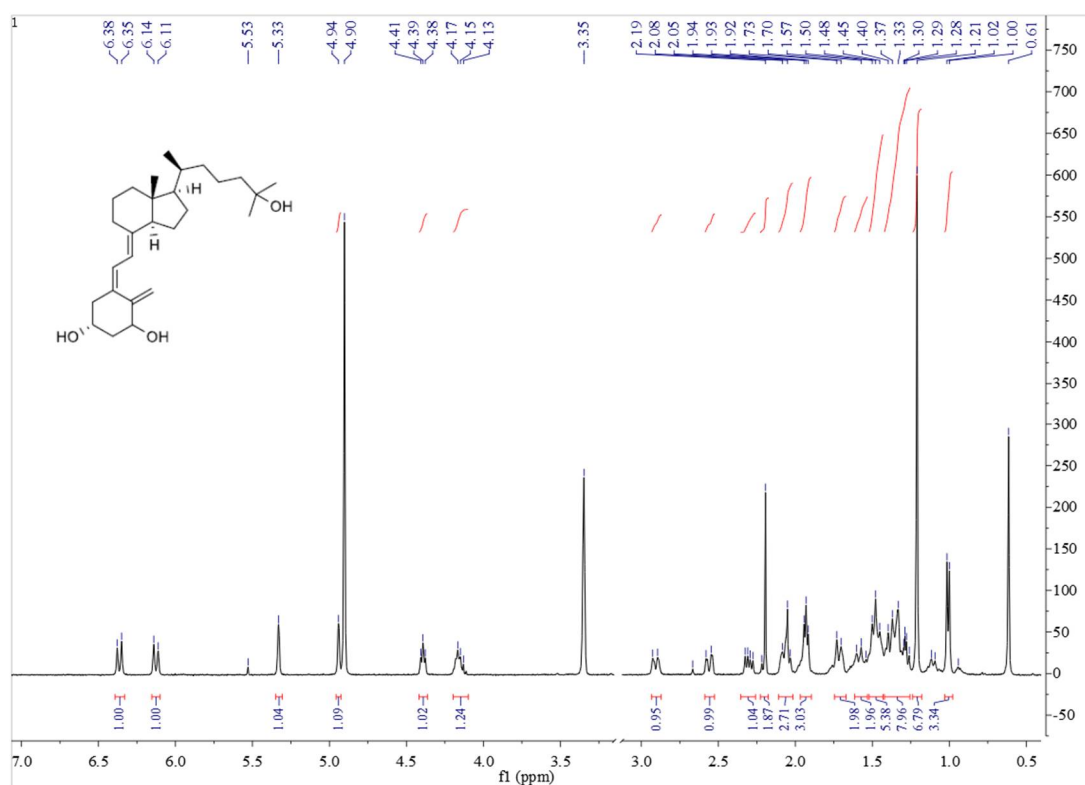

**Figure S3.** <sup>1</sup>H NMR of the isolated product calcitriol in CD<sub>3</sub>OD: (400 MHz, δ, ppm: 6.36-6.39 (d, 1H), 6.00-6.03 (d, 1H), 5.32 (s, 1H), 5.00 (s, 1H), 4.41- 4.44 (m, 1H), 4.22- 4.24 (m, 1H), 1.00-1.60 (m, 28H), 0.90- 0.95 (m, 3H), 0.75- 0.92 (m, 4H), 0.54 (s, 3H)).

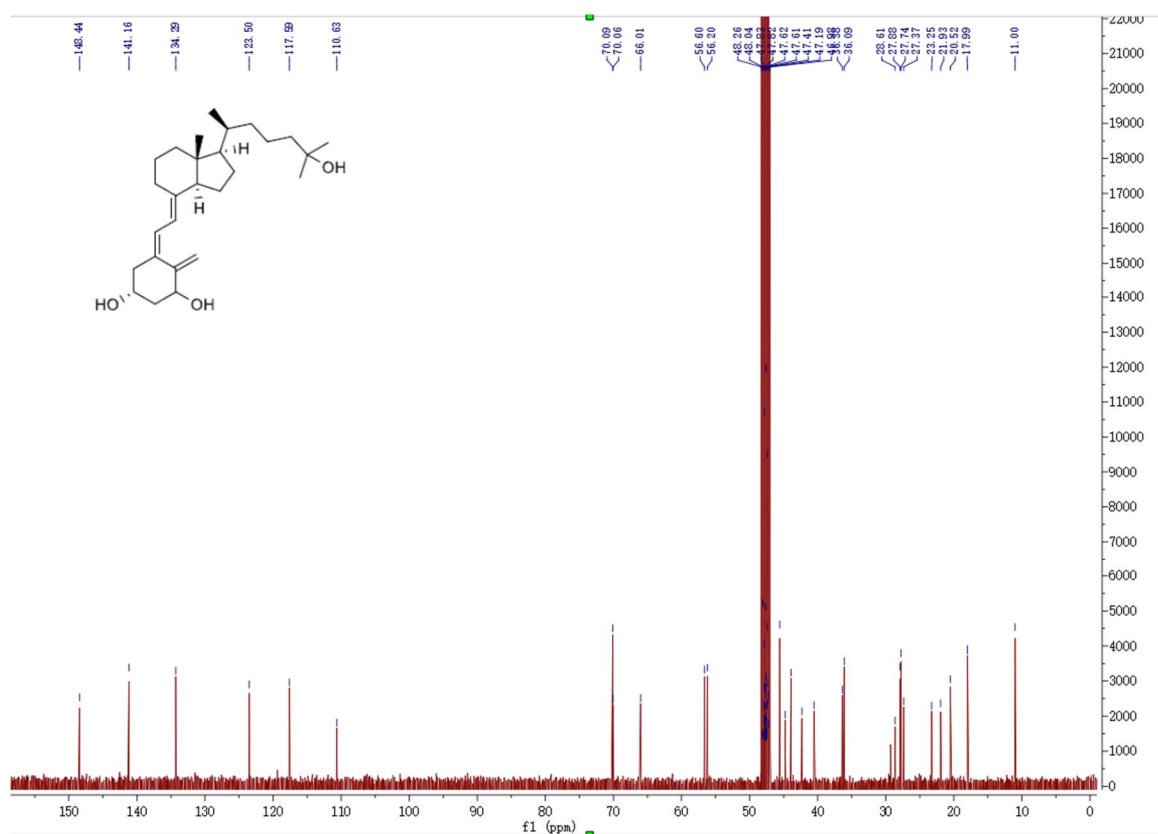

**Figure S4.** <sup>13</sup>C NMR of the isolated product calcitriol in CD<sub>3</sub>OD: (400 MHz, δ, ppm: 148.44, 141.16, 134.29, 123.50, 117.59, 110.63, 70.09, 70.06, 66.01, 56.60, 56.20, 45.59, 44.76, 43.91, 42.32, 40.54, 36.38, 36.09, 28.61, 27.88, 27.74, 27.37, 23.25, 21.93, 20.52, 17.99, 11.00).
